# Supplementary material for: Crystal structure of febuxostat marketed polymorph determined by electron diffraction and reinforced by X-ray crystallography
Source: Royal Society of Chemistry journal article supplement (doi:10.1039/d4ce00518j), 2024-01-01
Supplement: d4ce00518j2.pdf [file d4ce00518j2.pdf]

*Electronic Supplementary Information*

*For*

*Article*

# Crystal structure of Febuxostat marketed polymorph determined by electron diffraction and reinforced by X-ray crystallography

*Doriana T. Ungur<sup>a, b</sup>, Arianna Lanza<sup>c</sup>, Danny Stam<sup>d</sup>, Carmen Guguta<sup>e</sup>, Coca Iordache<sup>b</sup>, Victor Fruth<sup>f</sup>, Gustavo Santiso-Quinones<sup>d, g</sup>, Mihaela M. Pop<sup>\*b</sup>*

<sup>a</sup> Doctoral School in Integrative Biology, Faculty of Biology and Geology, “Babeş-Bolyai” University, Cluj-Napoca, Romania.

<sup>b</sup> TeraCrystal SRL, 67-103 Donat, 400293 Cluj-Napoca, Romania.

<sup>c</sup> University of Copenhagen, Universitetsparken 5, 2100 Copenhagen Ø, Denmark.

<sup>d</sup> ELDICO Scientific AG, Park Innovaare, 5234 Villigen, Switzerland.

<sup>e</sup> Technobis Crystallization Systems BV, Pyrietstraat 2, 1812 SC Alkmaar, The Netherlands.

<sup>f</sup> “Ilie Murgulescu” Institute of Physical Chemistry, Romanian Academy, 202 Splaiul Independenței, Bucharest, 060021, Romania.

<sup>g</sup> Crystallise! AG, Hegenheimermattweg 167A, 4123 Allschwil, Switzerland.

\* Author to whom correspondence should be addressed [mihaela.pop@teracrystal.com](mailto:mihaela.pop@teracrystal.com); [santiso@crystallise.ch](mailto:santiso@crystallise.ch)

**Table S1.** Crystallization experiments targeting form A.

| Solvent used       | Concentration of FEB [mg/mL] | Crystallization method                               | Form by X-ray powder diffraction |
|--------------------|------------------------------|------------------------------------------------------|----------------------------------|
| 2-Ethoxyethanol    | 30                           | Determination of MSZW                                | Form A + Q                       |
|                    | 60                           |                                                      |                                  |
|                    | 120                          |                                                      | Form A                           |
|                    | 240                          |                                                      |                                  |
|                    | 360                          |                                                      |                                  |
| Ethanol            | 30                           | Cooling evaporative crystallization                  | Form F3                          |
|                    | 60                           |                                                      |                                  |
|                    | 120                          |                                                      |                                  |
|                    | 180                          |                                                      |                                  |
| Acetonitrile/Water | 5                            | Anti-solvent vapor diffusion                         | Form A                           |
| 2-Ethoxyethanol    | -                            | Solvent-drop grinding                                | Form Q                           |
| THF                | -                            |                                                      | Form A + Q                       |
| 2-Ethoxyethanol    | 125                          | Recrystallization of solvent-drop grinding materials | Form A                           |
| 2-Ethoxyethanol    | 100                          | Cooling evaporative crystallization                  | Form A                           |
| THF                | 75                           |                                                      | Form A + Q                       |
| Ethanol            | 35                           |                                                      | Form F3                          |

**Table S2.** Calculation settings of the force fields used in the molecular mechanics calculations.

| Variable                               | Setting                       |
|----------------------------------------|-------------------------------|
| <i>Forcite</i>                         |                               |
| Optimization algorithm                 | Smart                         |
| Convergence energy                     | $2.0 \times 10^{-5}$ kcal/mol |
| Convergence force                      | 0.001 kcal/(mol Å)            |
| Convergence stress                     | 0.001 GPa                     |
| Conv. displacement                     | $1.0 \times 10^{-5}$ Å        |
| Max. iterations                        | 1000                          |
| External pressure                      | 0                             |
| Optimize cell                          | yes                           |
| <b>E<sup>-</sup> static sum method</b> | Ewald                         |
| Ewald accuracy                         | $1.0 \times 10^{-5}$ kcal/mol |
| Buffer width                           | 0.5 Å                         |
| <b>vdW sum method</b>                  | Ewald                         |
| Ewald accuracy                         | $1.0 \times 10^{-5}$ kcal/mol |
| Buffer width                           | 0.5 Å                         |
| Repulsive cutoff                       | 6.0 Å                         |
| H-bond sum method                      | atom based                    |
| Cutoff distance                        | 6.0 Å                         |
| Spline width                           | 0.5 Å                         |
| Buffer width                           | 0.5 Å                         |

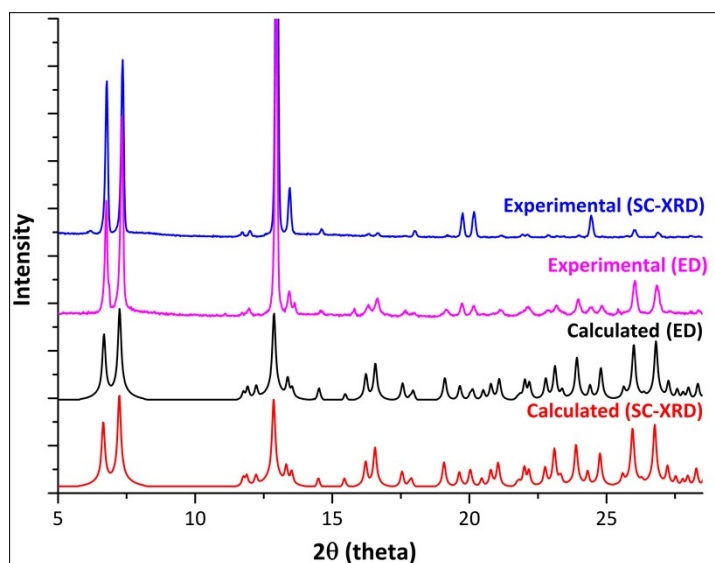

**Figure S1.** Experimental and calculated X-ray powder patterns of form A based on the SC-XRD and ED data.

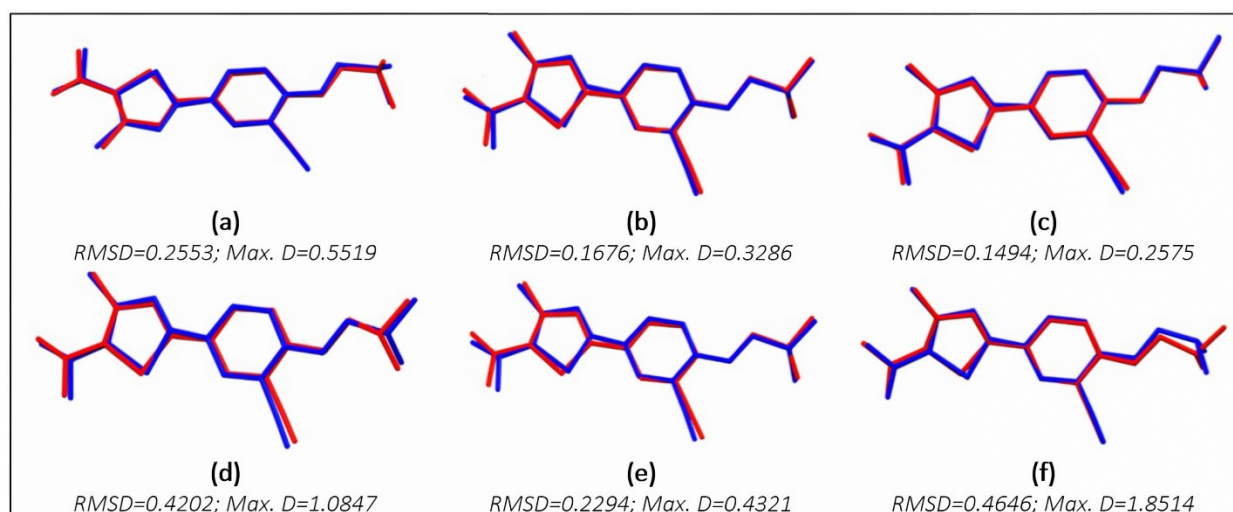

**Figure S2.** Overlays of the FEB molecules from the CSD structures with the unique conformers identified by the Boltzmann method: **(a)** HIQQAB02→molecule 1 (red) versus conformer F1 (blue); **(b)** HIQQAB02→molecule 2 (red) versus conformer F2 (blue); **(c)** UREQOY (red) versus conformer F2 (blue); **(d)** HIQQIJ (red) versus conformer F2 (blue); **(e)** HIQQUV (red) versus conformer F2 (blue) and **(f)** HIQQEF (red) versus conformer F5 (blue). All values are in Å.
