# Supplementary figures and images for: Crystal structure of febuxostat marketed polymorph determined by electron diffraction and reinforced by X-ray crystallography
Source: Royal Society of Chemistry journal article supplement (doi:10.1039/d4ce00518j), 2024-01-01

## FIGURE S1

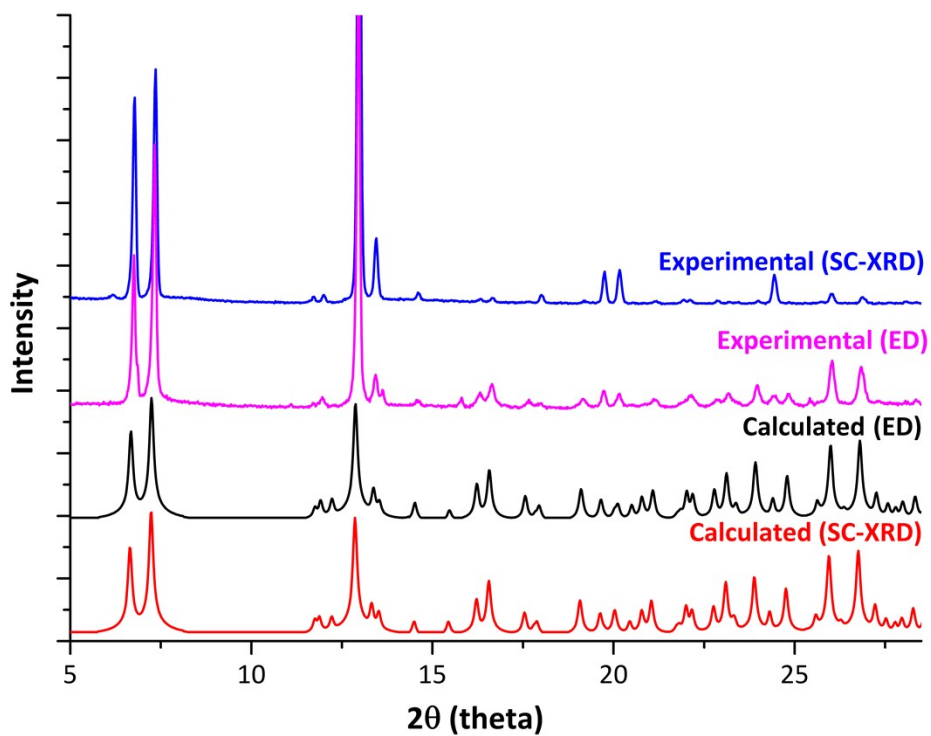

## FIGURE S2

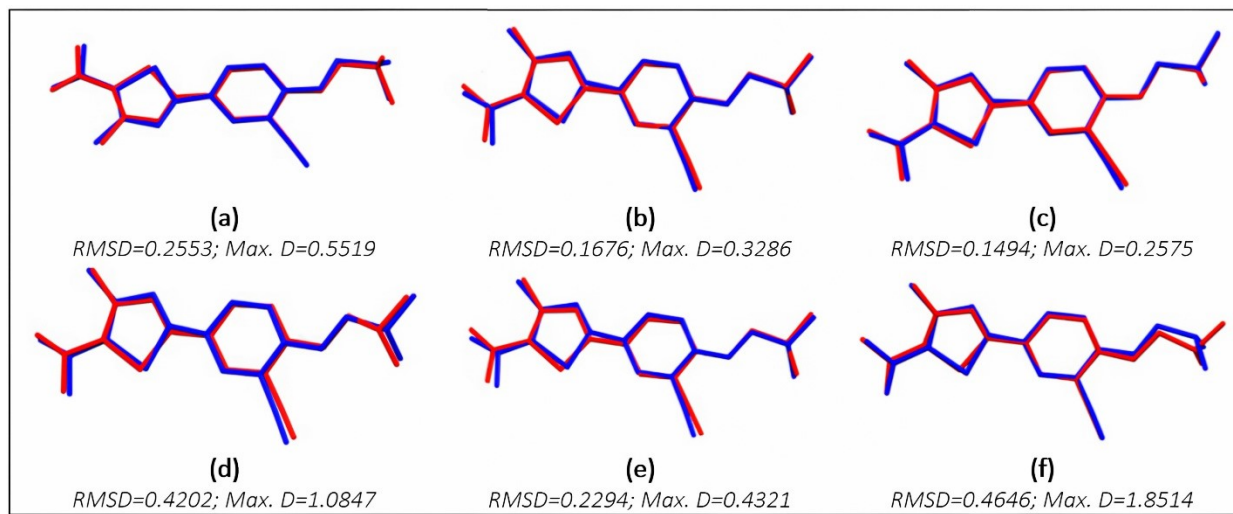

Supplement: d4ce00518j1.pdf [file d4ce00518j1.pdf]
